# Supplementary material for: Significant energy savings by optimising membrane design in the multi-stage reverse osmosis wastewater treatment process
Source: Royal Society of Chemistry journal article supplement (doi:10.1039/c7ew00455a), 2018-01-01
Supplement: c7ew00455a1.pdf [file c7ew00455a1.pdf]

There is no supplementary information available for this article.
